# Supplementary figures and images for: AML1/ETO sensitizes via TRAIL acute myeloid leukemia cells to the pro-apoptotic effects of hypoxia
Source: PubMed Central journal article supplement — Cell Death Dis. 2013 Mar 14;4(3):e536–. doi: 10.1038/cddis.2013.49 (PMC3613827; doi:10.1038/cddis.2013.49), 2013-03-14

# Figure S1

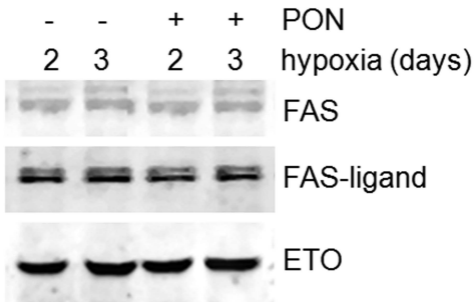

Supplement: cddis201349x1.pdf [file cddis201349x1.pdf]
